# Supplementary material for: Multivalent ruthenium immobilized by self-supported NiFe–organic frameworks for efficient electrocatalytic overall water splitting
Source: Royal Society of Chemistry journal article supplement (doi:10.1039/d2ta06560f), 2022-12-24
Supplement: d2ta06560f1.pdf [file d2ta06560f1.pdf]

## Supporting Information

# **Multivalent ruthenium immobilized by self-supported NiFe-organic frameworks for durable electrocatalytic overall water splitting**

Wei Jiang<sup>a,b,1</sup>, Jia Wang<sup>a,c,1</sup>, Yu Jiang<sup>a,c</sup>, Yuanyuan Wu<sup>a,c</sup>, Bo Liu<sup>a,c</sup>, , Xianyu Chu<sup>a,c</sup>, Chunbo Liu<sup>a,b,\*</sup>, Guangbo Che<sup>a,d,\*</sup>, Yang Lu<sup>e,\*</sup>

<sup>a</sup> Key Laboratory of Preparation and Application of Environmental Friendly Materials (Jilin Normal University), Ministry of Education, Changchun 130103, P. R. China.

<sup>b</sup> College of Engineering, Jilin Normal University, Siping, 136000, P. R. China.

<sup>c</sup> College of Chemistry, Jilin Normal University, Siping, 136000, P. R. China.

<sup>d</sup> College of Chemistry, Baicheng Normal University, Baicheng, 137000, P. R. China.

<sup>e</sup> College of mathematics and computer, Jilin Normal University, Siping, 136000, P. R. China.

<sup>1</sup> These authors contributed equally to this work.

\*Correspondence author

E-mail: [chunboliu@jlnu.edu.cn](mailto:chunboliu@jlnu.edu.cn) (Chunbo Liu)

E-mail: [guangboche@jlnu.edu.cn](mailto:guangboche@jlnu.edu.cn) (Guangbo Che)

E-mail: [luyang33@126.com](mailto:luyang33@126.com) (Yang Lu)

Fax: +86-434-3290623

## 1. Experimental

### 1.1 Materials

All chemicals and reagents were of analytical grade and used without further purification. H<sub>2</sub>BDC-NH<sub>2</sub> was purchased from Aladdin Reagent Co. Ltd. RuCl<sub>3</sub>•xH<sub>2</sub>O was obtained from Macklin Reagent Co. Ltd. N,N'-dimethylformamide (DMF) was offered from Tianjin Tiantai Chemicals Co. Ltd. Commercial NFF (thickness: 1.5 mm) was provided by Longshengbao Co. Ltd.

### 1.2 Characterization

X-ray powder diffraction (XRD) pattern characterization was recorded on a PC2500 diffractometer. Scanning electron microscopy (SEM) images were taken on a HITACHI-Regulus8100 scanning electron microscope. The functional groups of catalysts were characterized through Fourier transformed infrared (FT-IR, Thermoscientific Nicolet 4700). Corresponding energy-dispersive X-ray spectroscopy (EDX) elemental maps were gained using a UltimMax65 equipped with an Oxford energy dispersive spectrometer. X-ray photoelectron spectroscopy (XPS) was conducted on an ESCALAB250X X-ray photoelectron spectrometer.

### 1.3 Construction of Ru-doped NiFe-MOF powder

Firstly, 540.4 mg of Ni(NO<sub>3</sub>)<sub>2</sub>•6H<sub>2</sub>O, 135.1 mg of FeCl<sub>3</sub>•6H<sub>2</sub>O, and 362.4 mg of H<sub>2</sub>BDC-NH<sub>2</sub> were added in the the Teflon autoclave with 44.8 mL of DMF and 6.4 mL of ethanol. Subsequently, the Teflon autoclave was sealed and heated at 150°C for 3 h to obtain NiFe-MOF powder. After cleaned with ethanol and dried, the obtained NiFe-MOF powder was added to a 50 mL of ethanol solution containing 10 mg of RuCl<sub>3</sub> and then heated at 80°C for 12 h. After cooling down to room temperature, the Ru-doped NiFe-MOF powder was washed with ethanol and dried at 60°C.

### 1.3 Electrochemical measurements

All electrochemical tests of HER and OER were represented on a PGSTAT-302 N (Metrohm) electrochemical analyzer at room temperature. A typical three-electrode system was used, with a saturated calomel electrode as the reference electrode, carbon rod as the counter electrode, and each self-supported catalyst as the working electrode. The electrochemical test was carried out in 1 M KOH solution saturated with N<sub>2</sub>. The voltage range of LSV curve is 0.306 V-0.706 V and (-0.924 V)-(-1.124 V) with 80% iR compensation, and the sweep speed is 1 mV/s. The slope of Tafel is calculated by the formula  $\eta=a+b\cdot\log(j)$ . The impedance is measured in the range of 0.1-100 KHz with an amplitude of 5 mV. The Faraday efficiencies of hydrogen and oxygen production were measured at voltages -0.95 V and 0.51 V, respectively. In addition, Ru<sub>9,1</sub>-NiFe-MOF/NFF participated in electrochemical reaction with an area of 0.09 cm<sup>2</sup> and a loading capacity of 4.1 mg cm<sup>-3</sup>. The loading capacity of RuO<sub>2</sub>/NFF and Pt/C/NFF electrodes is 2.5 mg cm<sup>-2</sup>.

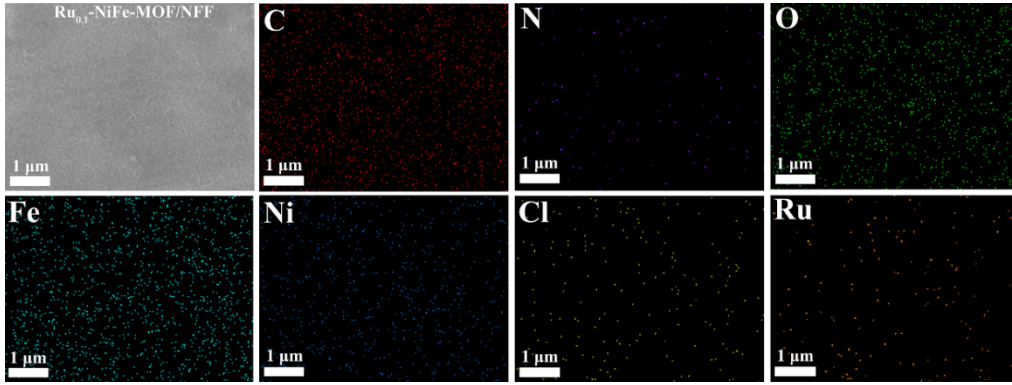

(a)

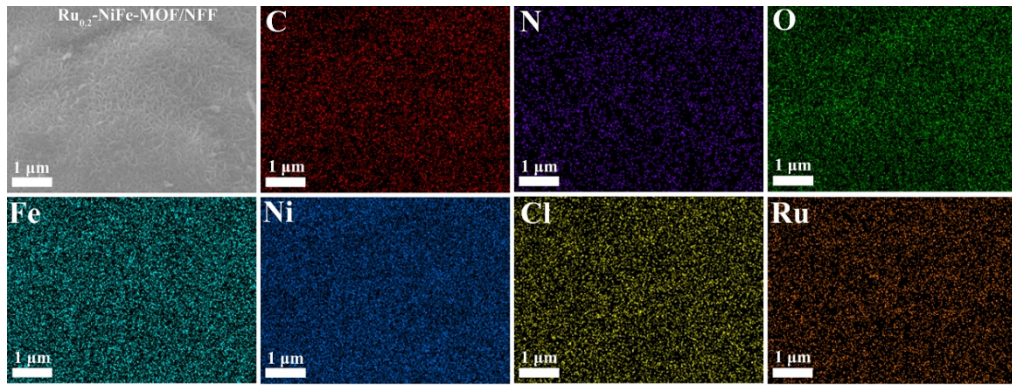

(b)

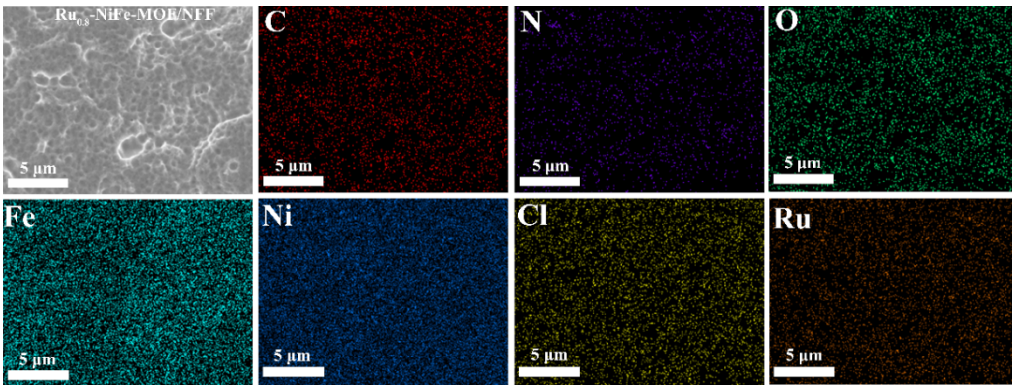

(c)

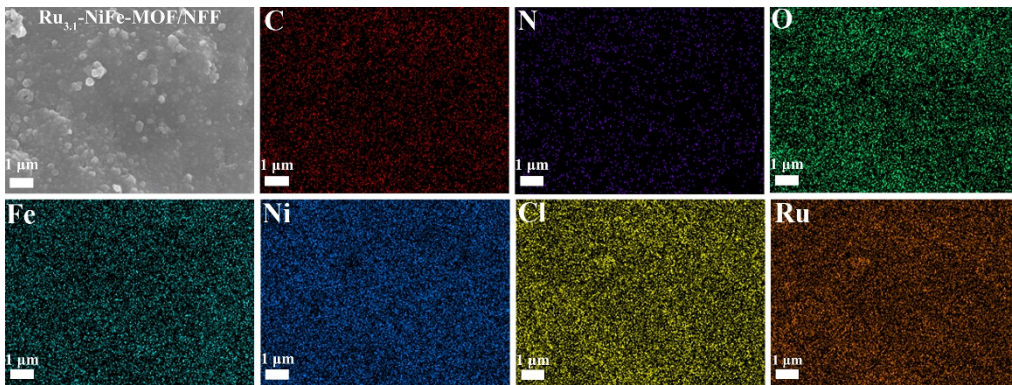

(d)

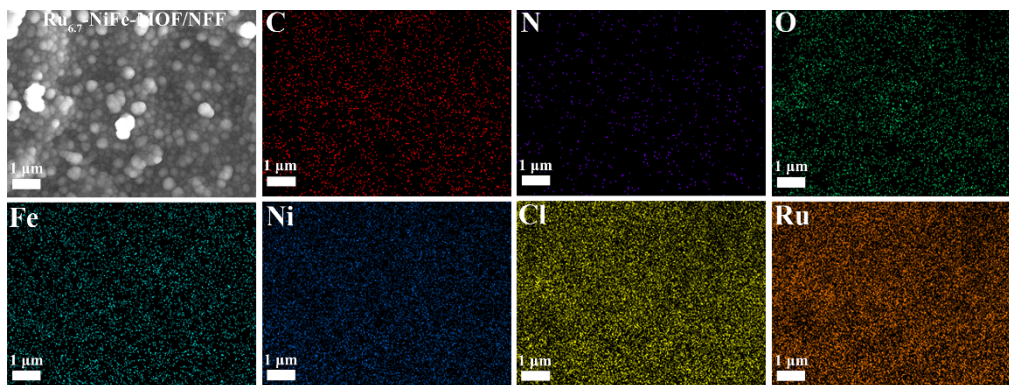

(e)

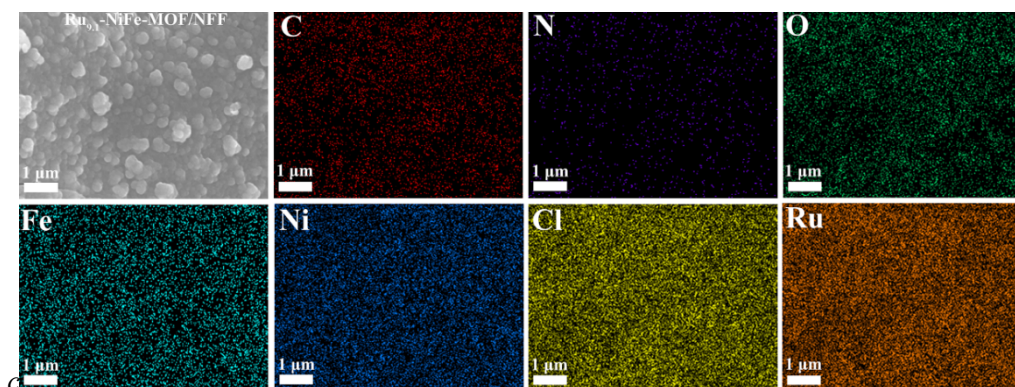

(f)

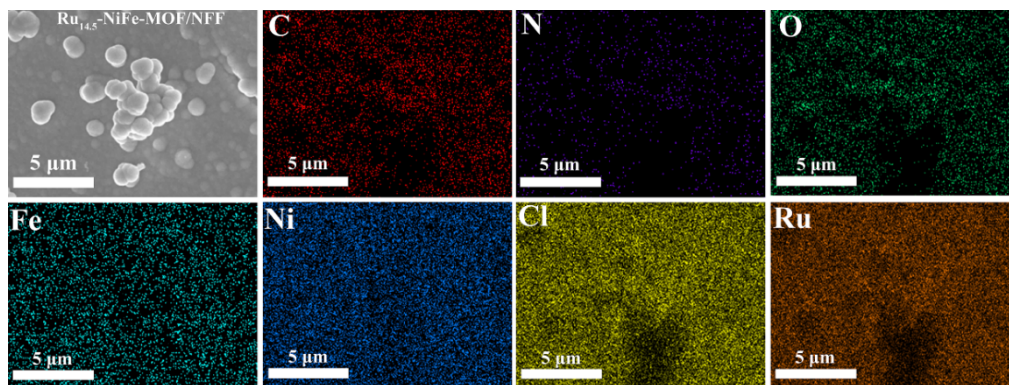

(g)

**Fig. S1.** The EDS-mapping of Ru<sub>0.1</sub>-NiFe-MOF/NFF (a), Ru<sub>0.2</sub>-NiFe-MOF/NFF (b), Ru<sub>0.8</sub>-NiFe-MOF/NFF (c), Ru<sub>3.1</sub>-NiFe-MOF/NFF (d), Ru<sub>6.7</sub>-NiFe-MOF/NFF (e), Ru<sub>9.1</sub>-NiFe-MOF/NFF (f), Ru<sub>14.5</sub>-NiFe-MOF/NFF(g).

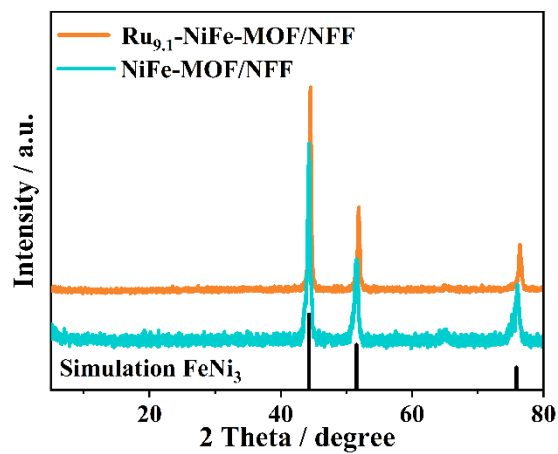

Fig. S2. XRD patterns of NiFe-MOF/NFF and Ru<sub>9,1</sub>-NiFe-MOF/NFF.

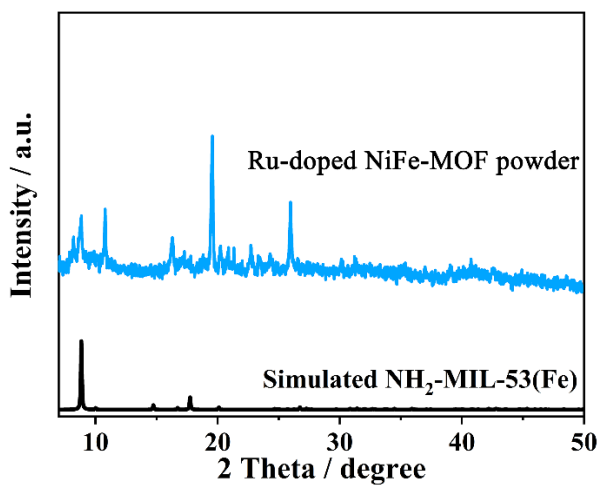

Fig. S3. XRD patterns of Ru-doped NiFe-MOF powder.

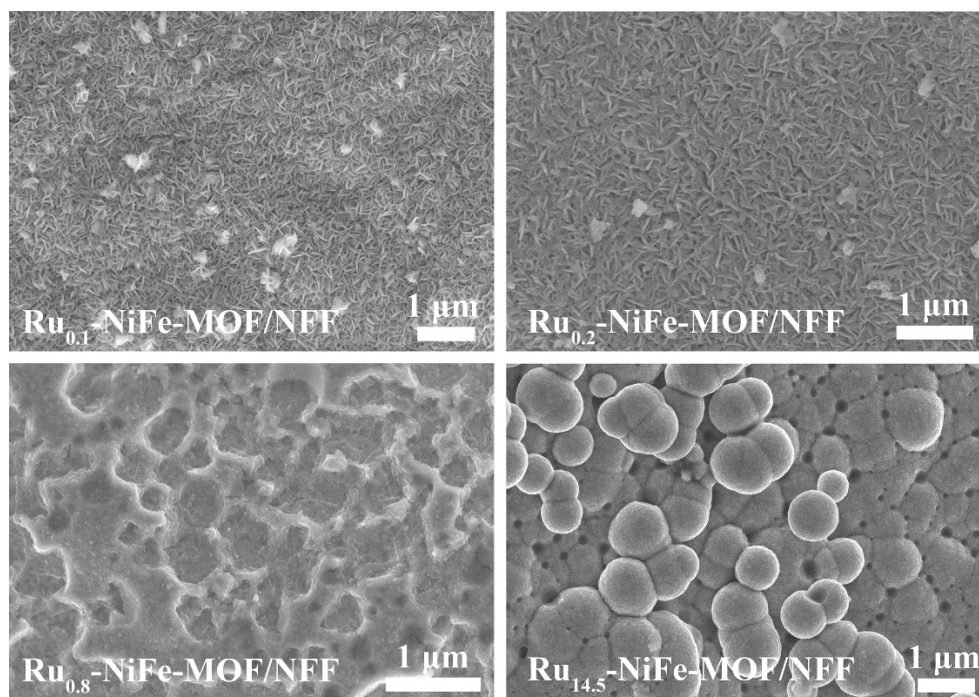

**Fig. S4.** SEM images of (a) Ru<sub>0.1</sub>-NiFe-MOF/NFF, (b) Ru<sub>0.2</sub>-NiFe-MOF/NFF, (c) Ru<sub>0.8</sub>-NiFe-MOF/NFF and (d) Ru<sub>14.5</sub>-NiFe-MOF/NFF.

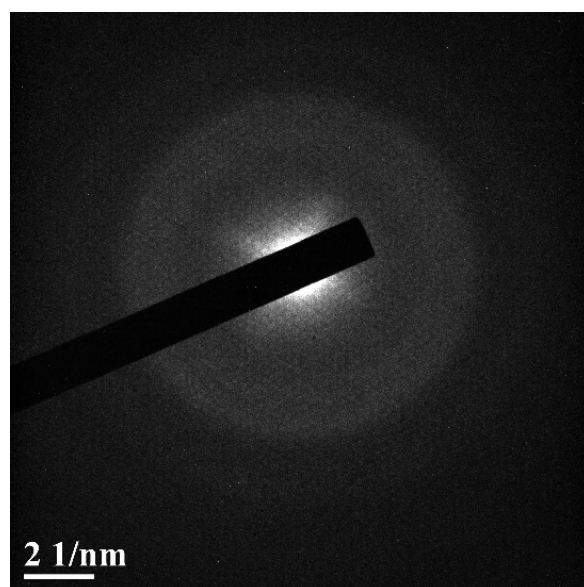

**Fig. S5.** The SAED pattern of Ru<sub>0.1</sub>-NiFe-MOF/NFF.

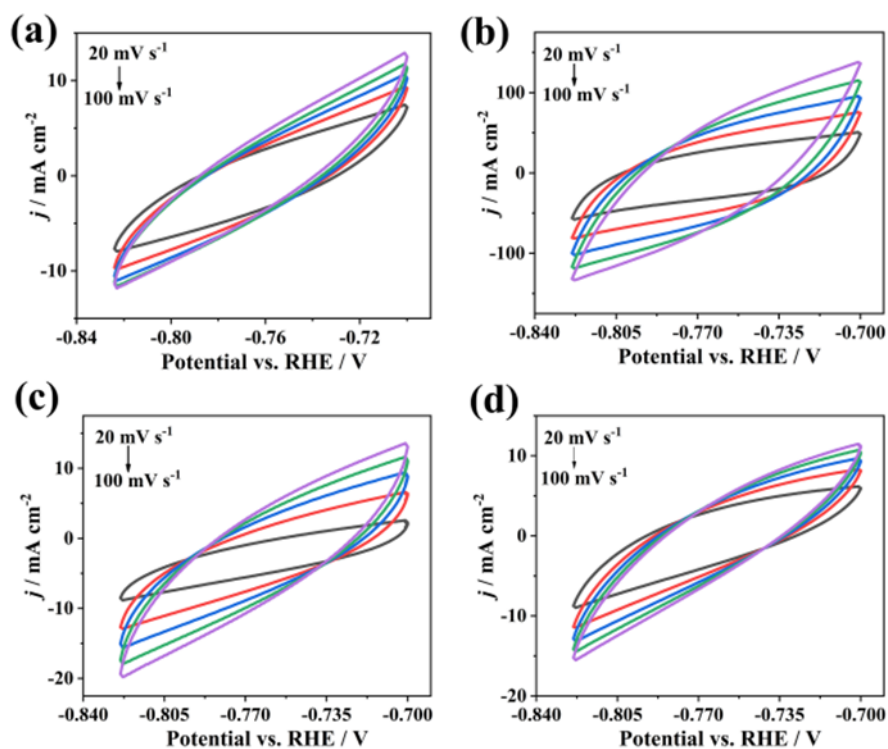

**Fig.S6.** Cyclic voltammograms of (a) NiFe-MOF/NFF, (b) Ru<sub>9,1</sub>-NiFe-MOF/NFF, (c) 20Ru/NFF and (d) NFF at scan rates from 20 to 100 mV s<sup>-1</sup> for HER.

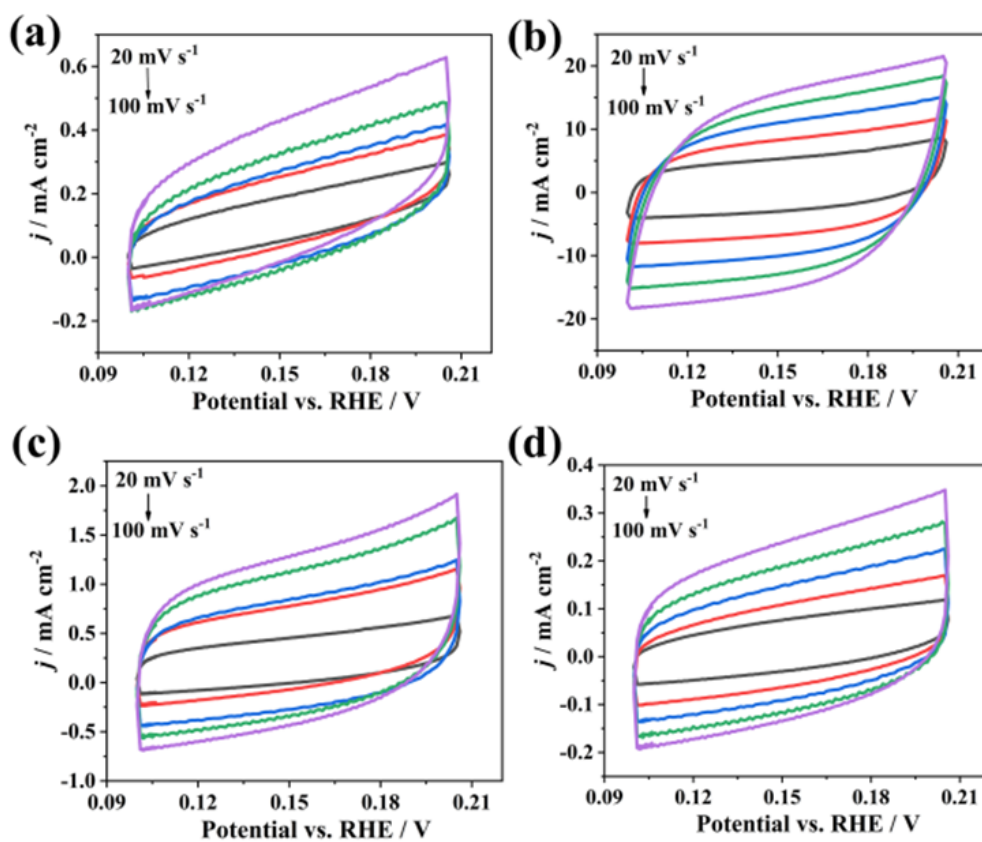

**Fig. S7.** Cyclic voltammograms of (a) NiFe-MOF/NFF, (b) Ru<sub>9,1</sub>-NiFe-MOF/NFF, (c) 20Ru/NFF

and (d) NFF at scan rates from 20 to 100 mV s<sup>-1</sup> for OER

**Table S1** The actual doping percent (at%) of Ru species in Ru<sub>x</sub>-NiFe-MOF/NFF determined by repeated EDS.

|                                  | Area 1 | Area 2 | Area 3 | Average |
|----------------------------------|--------|--------|--------|---------|
| Ru <sub>0.1</sub> -NiFe-MOF/NFF  | 0.1    | 0.1    | 0.1    | 0.1     |
| Ru <sub>0.2</sub> -NiFe-MOF/NFF  | 0.2    | 0.2    | 0.2    | 0.2     |
| Ru <sub>0.8</sub> -NiFe-MOF/NFF  | 0.8    | 0.6    | 0.9    | 0.8     |
| Ru <sub>3.1</sub> -NiFe-MOF/NFF  | 3.4    | 2.9    | 3.2    | 3.1     |
| Ru <sub>6.7</sub> -NiFe-MOF/NFF  | 6.2    | 6.9    | 7.0    | 6.7     |
| Ru <sub>9.1</sub> -NiFe-MOF/NFF  | 7.8    | 9.9    | 9.5    | 9.1     |
| Ru <sub>14.5</sub> -NiFe-MOF/NFF | 16.4   | 13     | 14     | 14.5    |

**Table S2** The corresponding actual doping content of Ru species with different amount of RuCl<sub>3</sub> usage.

| RuCl <sub>3</sub> usage (mg) | Actual doping content of Ru (%) |
|------------------------------|---------------------------------|
| 2                            | 0.1                             |
| 5                            | 0.2                             |
| 10                           | 0.8                             |
| 13                           | 3.7                             |
| 16                           | 6.7                             |
| 20                           | 9.1                             |
| 50                           | 14.5                            |

**Table S3** The actual doping percent (at%) of Cl species in Ru<sub>9.1</sub>-NiFe-MOF/NFF before and after catalysis determined by repeated EDS.

|                  | Area 1 | Area 2 | Area 3 | Average |
|------------------|--------|--------|--------|---------|
| before catalysis | 4.2    | 4.9    | 3.6    | 4.2     |
| after catalysis  | 0.1    | 0.2    | 0.3    | 0.2     |
